# Supplementary material for: Therapeutic strategy and prognostic analysis of inflammatory myofibroblastic tumor in the head and neck: a retrospective study
Source: PeerJ. 2025 Apr 18;13:e19315. doi: 10.7717/peerj.19315 (PMC12011016; doi:10.7717/peerj.19315)
Supplement: Supplemental Information 1 [file peerj-13-19315-s001.xlsx]

## Sheet: Sheet1
Case	Gender	Age	Clinical symptoms	Tumor location	White Blood Cell（reference 3.50-9.50）	CRP (reference 0-1mg/l)	Procalcitonin(reference 0.00-0.500ng/ml)	CT	MRI	Ultrasound	Electronic endoscopy	Surgery	Recurrence	Treatment after recurrence	Follow-up time(months)	Outcome
1	female	49	Left nasal congestion, purulent discharge and left maxillofacial swelling and pain for half a year	Left nasal cavity	13.69	11.31	1.517	Enhanced CT scan showed moderate enhancement with unclear boundary, accompanied by adjacent bone compressive bone resorption changes	No	No	Nasal endoscopy: there is no deformity in the external nose, and new organisms can be seen in the left nasal cavity, which is soft, easy to bleed, and light red in color. More purulent secretions are seen in the middle nasal tract	Resection of left nasal cavity mass under nasal endoscope	No	No	36	Disease-free survival
2	male	33	Right rhinorrhea with nasal congestion for 2 months	Right nasal cavity and paranasal sinus	5.78	0.65	No	Plain CT scan of the maxillofacial region showed abnormal density shadow filling in the paranasal sinuses, nasal passages and nasopharynx cavity, and new organisms with inflammation may	No	No	Endoscopy: the left nasal cavity is filled with white new organisms, with smooth surface and soft texture, obscuring the normal structure of the left nasal cavity.	Resection of right nasal cavity and paranasal sinus mass under nasal endoscope	No	No	48	Disease-free survival
3	male	54	Painless tumor of the right parotid gland was found for more than 1 month	Right parotid gland	7.95	0.05	0.017	The superficial lobe of the right parotid gland was occupied, and the nature was undetermined	No	A parenchymal tumor with a size of 2.5*0.82cm can be seen in the right parotid gland. The boundary is unclear, the shape is irregular, the interior is slightly hypoechoic, and the distribution is uneven. CDFI: blood flow signal is sparse. Ultrasound: right parotid gland tumor.	No	Right superficial parotidectomy and mass excision	Painless mass around the right ear	right parotidectomy	92	Disease-free survival
4	male	63	Left cheek distension and pain for 4 months	Left nasal cavity and paranasal sinus	8.25	0.32	No	The left maxillary sinus was occupied by soft tissue, and the lesion showed moderate enhancement on enhanced scan with unclear boundary, accompanied by compressive bone resorption changes of adjacent bone	No	No	No	Subtotal resection of left maxilla and nasal cavity mass under lateral nasal incision	Two years after surgery, the right face was swollen and uplifted again without tenderness. Imaging examination revealed that the right maxillary tumor recurred and invaded the posterior wall of the maxillary sinus, pterygopalatine fossa, infraorbital wall and part of the inner wall	nasal lateral incision and maxillectomy	55	With disease survival
5	male	72	Hoarse voice for half a year	Larynx	5.26	0.45	0.011	No	MRI examination of the larynx showed that a nodular shadow could be seen in the right front of the glottic area, showing a slightly longer T2 and slightly longer T1 signal, with a size of about 9.6mm × 7.0mm. After enhancement, it could be seen that it was significantly enhanced, and the base was blurred	No	The right vocal cord front is a broad-based new organism, about 10cm × 10mm in size, with smooth surface and normal bilateral vocal cord activity; No new organisms were found in the left vocal cord	Laryngofissure and resection of right vocal cord mass	No	No	24	Disease-free survival
6	female	9	There was a tumor about the size of "longan" on the left tongue for 20 days, without pain and other discomfort symptoms	Tongue	7.75	0.77	0.23	On contrast-enhanced scan of the left lingual margin, the lesion was significantly enhanced, and there was still enhancement in the delayed phase.	Abnormal signal at the left front edge of the base of the tongue. The lesions at the left front edge of the tongue edge are significantly enhanced. Combined with plain scan, it is considered benign. Hemangioma may	No	No	Resection of left tongue mass	No	No	15	Disease-free survival
7	female	19	Nasal congestion and runny nose for more than 1 month	Nasopharynx	8.18	0.21	0.434	CT of paranasal sinus: soft tissue mass can be seen in the posterior nostril area of the left nasal cavity, with unclear boundary, the range is about 45mm, and the adjacent bone compressive bone resorption changes	MRI showed a soft tissue mass in the posterior naris of the left nasal cavity. Considering benign lesions, polyps may be present.	No	Electronic nasopharyngoscopy: tumor blockage can be seen in the left nasal tract	Combined oral and nasal approach for mass resection of nasopharynx under endoscope	Eighteen months after surgery, maxillofacial swelling occurred, and CT examination revealed recurrence	Extended resection of nasopharyngeal tumor,adjuvant chemotherapy and the ALK inhibitor Crizotinib	44	With disease survival
8	male	47	Right submaxillary painless tumor for 1 month	Right submandibular gland	3.58	No	No	Irregular soft tissue density foci can be seen in the right submandibular area, and the boundary between plain scan and the right submandibular gland, right parapharyngeal space area is not clear	Irregular slightly long T1 and T2 signals can be seen in the right submaxillary. The scope of plain scan is unclear. DWI shows high signal. The boundary with the right submandibular gland and the right parapharyngeal space is unclear. The right submandibular gland is fuller than the contralateral side. The right pyriform recess narrowed. Imaging opinion: tumor in the right submandibular area, fur…	The volume of the right submandibular gland is increased, the shape is full, the echo of the gland is reduced and thickened, and the distribution is uneven. The inner duct can be seen to be widened, and the widest part is about 0.21cm. There is no obvious calcification shadow in the gland, and CDFI: the blood flow signal in the gland is significantly increased. Ultrasound tips: diffuse parenchyma…	No	Right submandibular gland and mass excision	No	No	16	Disease-free survival
9	female	7	Inspiratory dyspnea for 20 days	Subglottic endotracheal	9.04	0.08	0.05	A columnar high-density shadow can be seen at the right rear of the horizontal trachea of the thyroid gland, and part of it protrudes into the trachea cavity. The maximum axial dimension is about 1.2 × 0.9CM in size and 2.8cm in length. The corresponding trachea cavity is narrowed. The phase II CT values of enhanced scanning are about 80hu and 122hu, respectively. Examination conclusion: the thyr…	No	No	No	Resection of subglottic endotracheal mass under endoscope	CT Reexamination 2 months after the operation showed that soft tissue density shadow was seen in the subglottic area and the right wall of the trachea at the entrance of the chest vault, with the maximum layer of 1.4cmx0.8cm, protruding into and out of the lumen, narrowing of the local lumen, and moderate enhancement. Examination conclusion: the soft tissue density shadow of the right tracheal wa…	Endoscopic holmium laser thermal ablation	18	Disease-free survival
10	female	56	Progressive enlargement of the tumor in the right neck was found for 10 days	Right neck	4.35	0.03	No	Irregular soft tissue shadow can be seen at the right cervical root, and no abnormal enhancement is found on enhanced scan	No	Neck ultrasound: hypoechoic nodule of the sternocleidomastoid muscle sternoclavicular joint of the lateral neck, please consider along with the clinical	No	Extended excision of right neck mass	No	No	10	Disease-free survival
11	male	37	Painless mass in the right mandibular molar area was found for more than two months	Right gingiva	4.63	0.68	No	No	MRI findings: Oval like long T1 long T2 signal shadow can be seen in the right cheek, DWI scan shows high signal shadow, corresponding to ADC image edge and other signals, intravenous injection of contrast agent Gd-DTPA for enhanced scan shows that the above lesions show obvious uneven enhancement, non enhanced area can be seen in the center, and the size of the lesion is about 1.71cm*1 45cm*2 34…	No	No	Extended resection of right buccal and gingival masses + partial mandibulectomy + transplantation of anterolateral femoral skin flap + temporary tracheotomy	No	No	30	Disease-free survival
12	male	60	Hoarseness for 1 month	Larynx	6.48	无	0.227	No	No	No	Pale yellow cyst like new organism in the front and middle of the left vocal cord, no abnormality in the right vocal cord	Extended resection of vocal cord mass under endoscope	No	No	11	Non-neoplastic death

## Sheet: Sheet2
Case	Tumor location	SMA	Vimentin	Desmin	ALK	MSA	CD117	S-100	Dog-1	EMA	P40	CD34	CK-pan	Ki-67
1	Left nasal cavity	+	-	+	NP	NP	-	-	-	-	NP	endothelium+	±	0.03
2	Right nasal cavity and paranasal sinus	+	+	weakly+	+	+	-	NP	NP	NP	NP	-	+	0.1
3	Right parotid gland	-	+	NP	+	weakly+	NP	-	weakly+	NP	-	-	+	0.3
4	Left nasal cavity and paranasal sinus	+	+	-	-	-	-	-	NP	NP	NP	NP	-	0.25
5	Larynx	+	-	+	-	-	weakly+	-	-	-	NP	NP	NP	0.05
6	Tongue	+	+	-	-	+	NP	-	NP	NP	-	-	-	0.1
7	Nasopharynx	+	+	-	+	weakly+	-	weakly+	-	NP	NP	-	+	0.25
8	Right submandibular gland	+	+	+	-	-	-	-	-	-	NP	Vcascular+	NP	0.05
9	Subglottic endotracheal	+	+	NP	+	NP	NP	weakly+	-	NP	NP	NP	NP	0.3
10	Right neck	-	+	+	+	NP	-	NP	NP	weakly+	NP	NP	+	0.1
11	Right gingiva	+	-	+	-	+	-	-	NP	-	-	-	NP	0.15
12	Larynx	+	-	+	+	NP	-	NP	weakly+	weakly+	NP	NP	NP	0.08
